# Supplementary material for: Causes, Failure Mechanisms and Susceptibility Zonation of Landslides along Gedo-Dilb Road Corridor, Northern Ethiopian
Source: Research Square preprint supplement (doi:10.21203/rs.3.rs-3030483/v1), 2023-06-12
Supplement: Supplementary file 1 [file 43e3dda0b76ae8f7285f10e1.docx]

Highlights (for Reviewers)

- Landslide inventory map was prepared from field survey, aerial photos and Google Earth.
- Geological map of the area was prepared using topographic map of Godguadit sheet as base map through field investigation.
- The geotechnical property of soils and rocks was determined through in-situ field test and laboratory analysis.
- Stability of selected slope sections was determined using Slide 6 software.
- GIS-based analytical hierarchy process (AHP) method used to produce landslide susceptibility map.
- The geological, geotechnical information of the area was used as input data for the priority of parameters in the AHP process.
- A total of 103 landslides were inventoried in the study area.
- The area under curve (AUC) used to validate the final map.
